# Supplementary material for: HCl post-processing BiOBr photocatalyst: structure, morphology, and composition and their impacts to activity
Source: Royal Society of Chemistry journal article supplement (doi:10.1039/c7ra08871j), 2017-01-01
Supplement: c7ra08871j1.pdf [file c7ra08871j1.pdf]

## Electronic Supplementary Information

### HCl post-processing BiOBr photocatalyst: Structure, morphology, and composition and their impacts to activity

Min Hu,<sup>a</sup> Rui Li,<sup>a</sup> Xiaochao Zhang,<sup>\*a</sup> Changming Zhang,<sup>a</sup> Hui Zhang,<sup>\*b</sup> Caimei Fan,<sup>\*a</sup> Jesse Zhu,<sup>b</sup>

<sup>1</sup>*College of Chemistry and Chemical Engineering, Taiyuan University of Technology, Taiyuan 030024, PR China*

<sup>2</sup>*Particle Technology Research Centre, Department of Chemical and Biochemical Engineering, The University of Western Ontario, London, Ontario N6A 5B9, Canada*

*\*Corresponding author.*

*Tel.: +86-351-6018193; +86-13007011210; fax: +86-351-6018554.*

*E-mail address: zhangxiaochao@tyut.edu.cn (X.C. Zhang);*

*hzhang1@uwo.ca (H. Zhu);*

*fancm@163.com (C.M. Fan)*

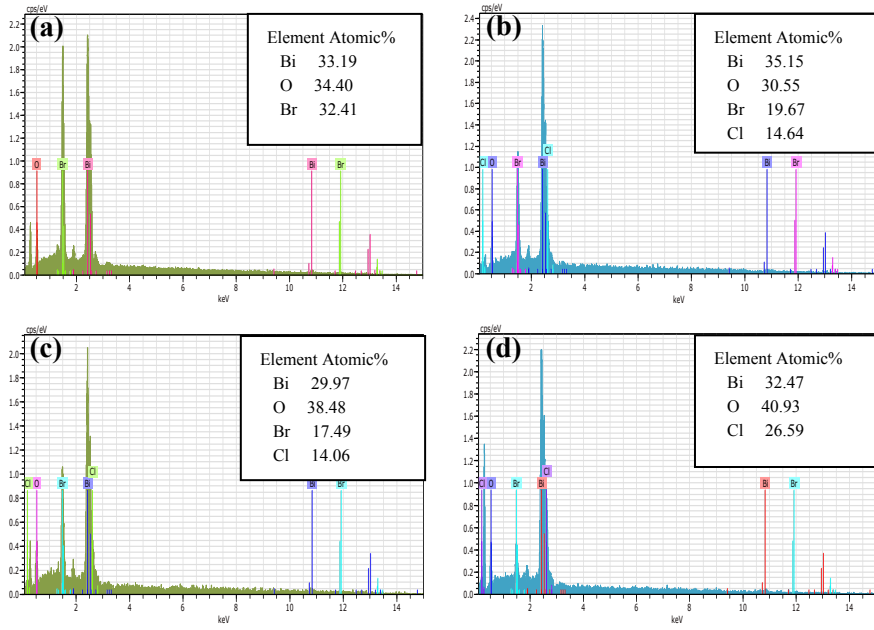

Fig. S1. EDX patterns of (a) BOB, (b) BOB-HC2, (c) BOB-HC3, and (d) BOB-HC5 samples

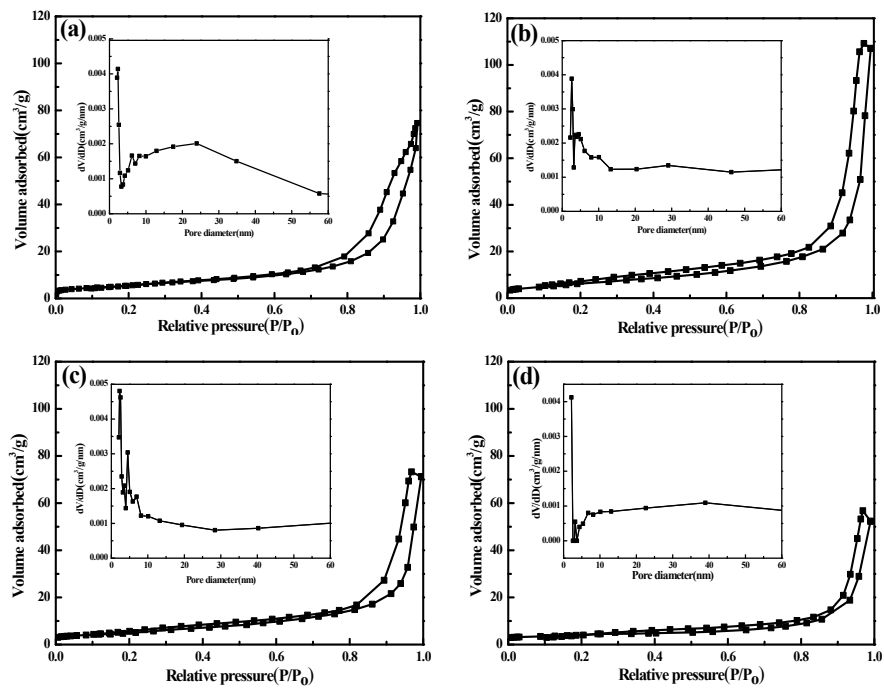

Fig. S2. Nitrogen adsorption-desorption isotherms and pore size distribution for: (a) BOB, (b) BOB-HC2, (c) BOB-HC3, and (d) BOB-HC5 samples

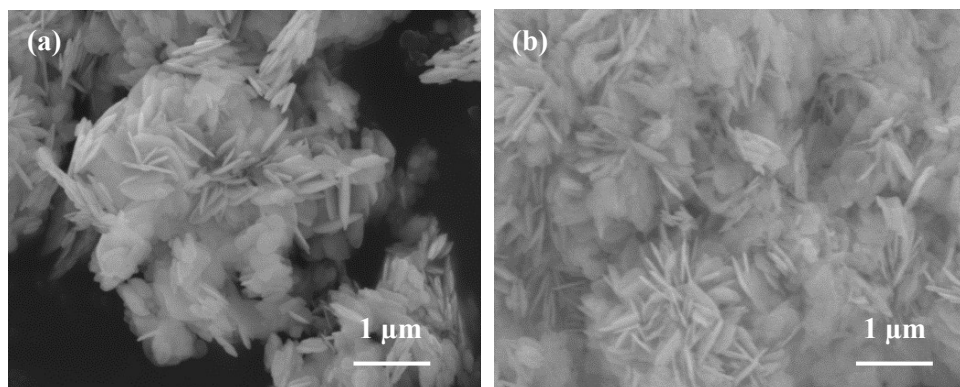

**Fig. S3. SEM images of (a) fresh and (b) used BOB-HC3 catalysts**

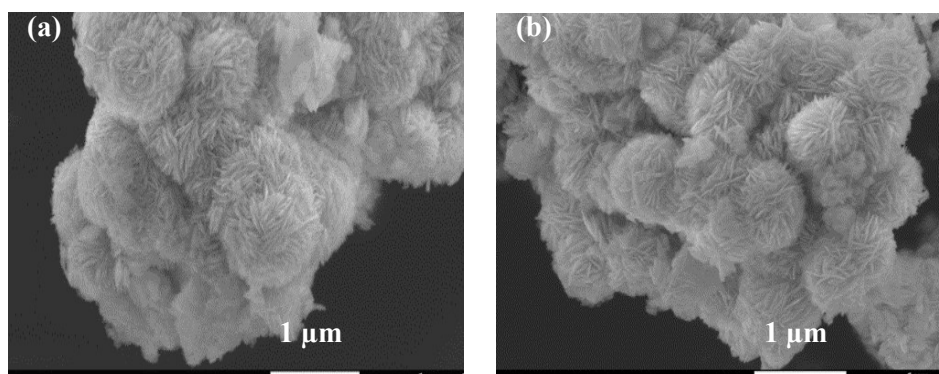

**Fig. S4. SEM images of (a) BOB-NC and (b) BOB samples**

**Table S1 Values of electronegativity of atoms calculated from the ionization energy and the electron affinity energy**

| Atoms | The ionization energy (kJ/mol) | The electron affinity energy (kJ/mol) | electronegativity (eV) |
|-------|--------------------------------|---------------------------------------|------------------------|
| Bi    | 703.0                          | 91                                    | 4.11                   |
| O     | 1313.9                         | 141                                   | 7.54                   |
| Cl    | 1251.2                         | 349                                   | 8.29                   |
| Br    | 1139.9                         | 324                                   | 7.59                   |
